# Supplementary material for: Copper proteomes, phylogenetics and evolution
Source: Royal Society of Chemistry journal article supplement (doi:10.1039/c0mt00045k), 2010-11-01
Supplement: c0mt00045k.pdf [file c0mt00045k.pdf]

## Supplementary Data

**Table S1** – The 44 retrieved Cu-binding domains with the eventual Metal Binding Pattern.

| <i>Pfam domain</i> | <i>Cu-binding pattern</i>   |
|--------------------|-----------------------------|
| Ald_Xan_dh_C2      | CX(0)S                      |
| AMO                | No pattern                  |
| AmoC               | No pattern                  |
| Biopterin_H        | No pattern                  |
| CCoS               | No pattern                  |
| CdhC               | CX(85)CX(1)C                |
| Cmc1               | No pattern                  |
| CopB               | No pattern                  |
| CopC               | MX(10)M                     |
| CopD               | No pattern                  |
| Copper-bind        | HX(37)CX(2)HX(2)M           |
| Copper-fist        | No pattern                  |
| COX1               | HX(49)HX(0)H                |
| COX17              | CX(2)C                      |
| COX2               | HX(34)CX(1)QX(1)CX(3)HX(2)M |
| COX2_TM            | No pattern                  |
| CtaG_Cox11         | No pattern                  |
| Ctr                | No pattern                  |
| Cu_amine_oxid      | YX(48)HX(1)HX(158)H         |
| Cu_bind_like       | HX(42)CX(4)HX(4)Q           |
| Cu2_monoox_C       | HX(1)HX(69)M                |
| Cu2_monooxygen     | HX(0)HX(63)H                |
| Cu-oxidase         | HX(42)CX(4)H                |
| Cu-oxidase_2       | HX(40)CX(8)HX(4)M           |
| Cu-oxidase_3       | HX(40)CX(7)HX(4)M           |
| Cu-oxidase_4       | No pattern                  |
| CutA1              | DX(0)K                      |
| CutC               | No pattern                  |
| Glyco_hydro_10     | DX(3)EX(59)H                |
| Hemocyanin_M       | HX(3)HX(25)H                |
| HMA                | CX(0)AX(1)C                 |
| Lysyl_oxidase      | No pattern                  |
| Metallothio        | No pattern                  |
| Metallothio_11     | No pattern                  |
| Metallothio_5      | No pattern                  |
| Metallothio_Pro    | No pattern                  |
| Metallothionein    | No pattern                  |
| Monooxygenase_B    | HX(23)HX(331)Q              |

Supplementary Material (ESI) for Metallomics

This journal is © The Royal Society of Chemistry 2010

|            |                               |
|------------|-------------------------------|
| NlpE       | No pattern                    |
| NosD       | No pattern                    |
| NosL       | No pattern                    |
| Sod_Cu     | HX(1)HX(22)HX(54)H            |
| Tyrosinase | HX(18)HX(8)HX(99)HX(3)HX(26)H |
| Uricase    | No pattern                    |
